# Supplementary material for: Metal–organic frameworks as affinity agents to enhance the microdialysis sampling efficiency of fatty acids
Source: Royal Society of Chemistry journal article supplement (doi:10.1039/c8an00238j), 2018-01-01
Supplement: c8an00238j1.pdf [file c8an00238j1.pdf]

## **Metal-organic frameworks as affinity agents to enhance microdialysis sampling efficiency of fatty acids**

Hui Yang<sup>a,b</sup> · Tuo Li<sup>a,b</sup> · Lu Liu<sup>a,b</sup> · Na Li<sup>a,b</sup> · Ming Guan<sup>a,b</sup> · Yangyang Zhang<sup>a</sup> · Zhenpeng Wang<sup>a</sup> ·  
Zhenwen Zhao<sup>\*,a,b</sup>

<sup>a</sup>Beijing National Laboratory for Molecular Sciences, CAS Research/Education Center for Excellence in Molecular Sciences, Key Laboratory of Analytical Chemistry for Living Biosystems, Institute of Chemistry Chinese Academy of Sciences, Beijing Mass Spectrum Center, Beijing, China

<sup>b</sup>Graduate School, University of Chinese Academy of Sciences, Beijing, China

**\*Corresponding author:** Phone: +86-10-62561239. Email: [zhenwenzhao@iccas.ac.cn](mailto:zhenwenzhao@iccas.ac.cn). ORCID

[iD: 0000-0001-6127-808X](https://orcid.org/0000-0001-6127-808X)

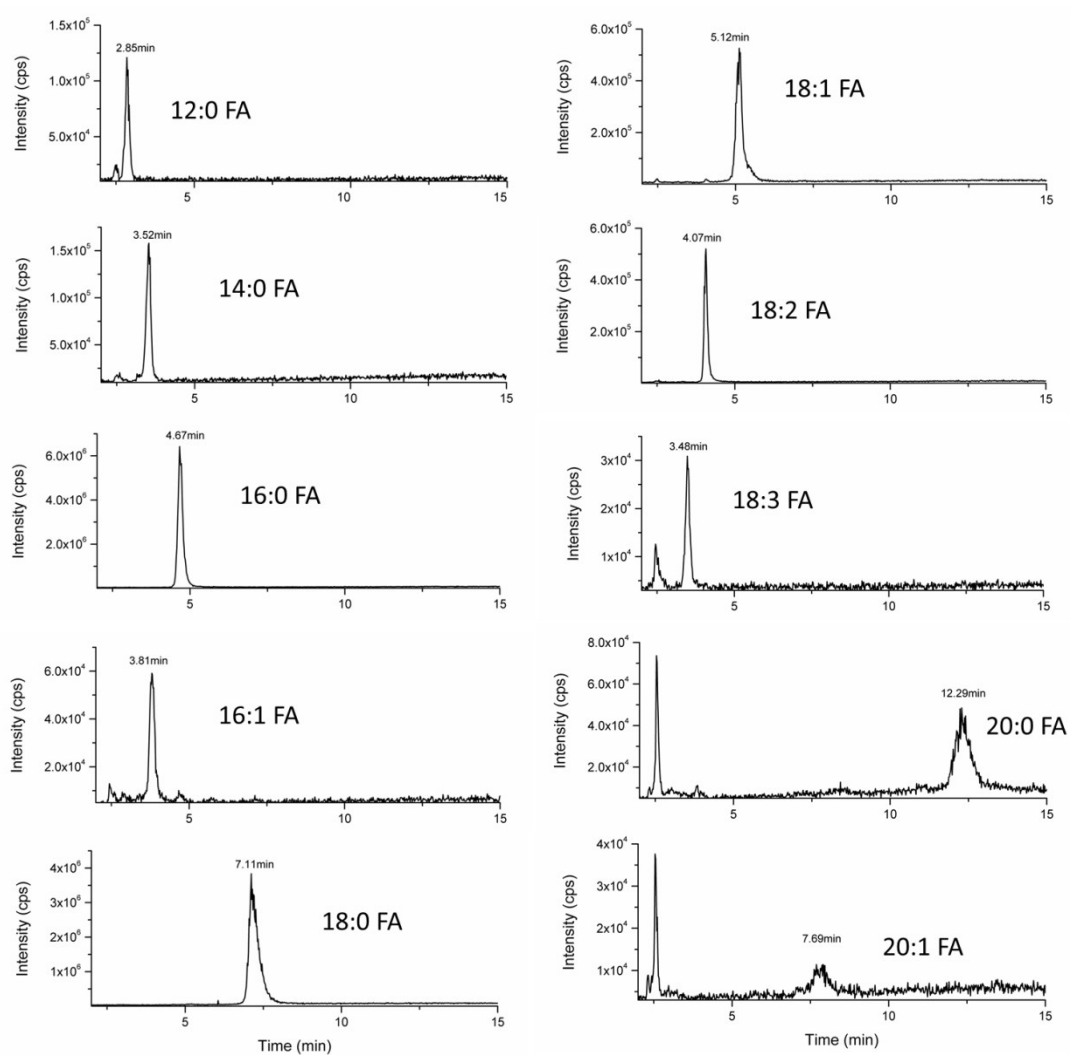

**Figure S1.** The representative extracted ion chromatograms (XICs) of FAs in dialysate of cell culture mediums.

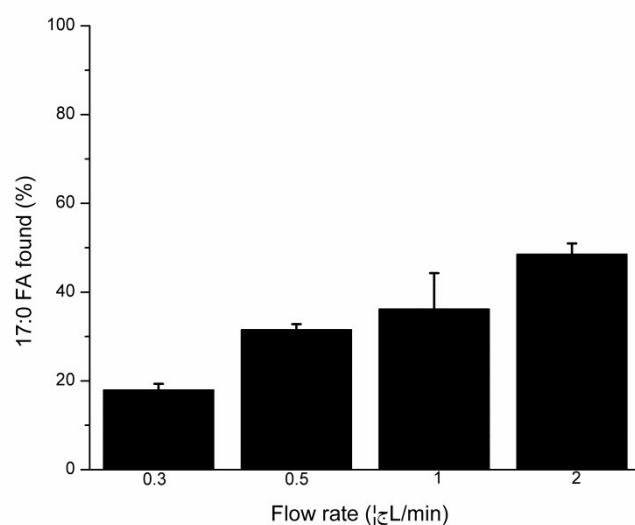

**Figure S2.** Non-specific adsorption of FA in the microdialysis system. Percentage of initially added 17:0 FA found in the perfusion fluid after passage through the microdialysis system at four different flow rates after 1 h equilibration time. The data are expressed as the mean  $\pm$  SD of three separate measurements.

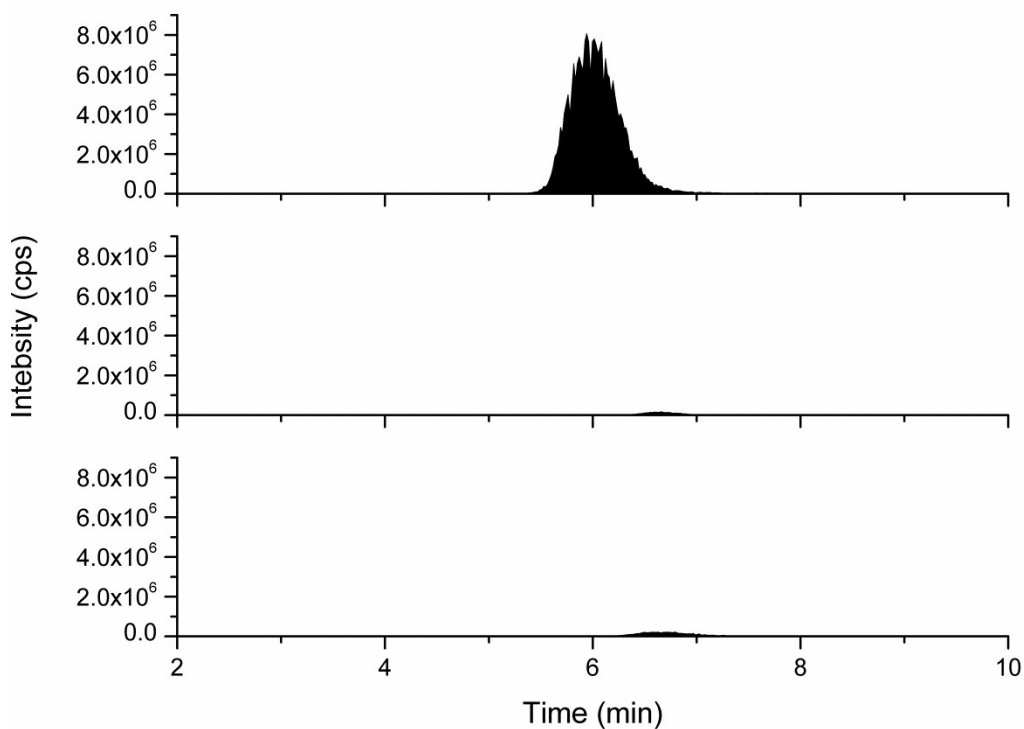

**Figure S3.** Ultrahigh performance liquid chromatography- QTrap extracted ion chromatograms (XIC) for 17:0 FA in original standard solution (top) and supernatant after MIL-101 (middle) or ZIF-8 (bottom) extraction.

**Table S1.** Microdialysis relative recovery of 17:0 FA standard at four different flow rates.

| Fatty acids | Flow rate (μL/min) | Relative recovery (%) |
|-------------|--------------------|-----------------------|
| C17 FA      | 0.3                | 13.07±5.61            |
|             | 0.5                | 23.79±1.75            |
|             | 1                  | 27.15±3.45            |
|             | 2                  | 33.64±4.64            |
